# Supplementary material for: Graphene–MoO2 hierarchical nanoarchitectures: in situ reduction synthesis and high rate cycling performance as lithium-ion battery anodes
Source: Royal Society of Chemistry journal article supplement (doi:10.1039/c3ra42319k), 2013-01-01
Supplement: c3ra42319k.pdf [file c3ra42319k.pdf]

## Electronic Supplementary Information

Graphene/MoO<sub>2</sub> hierarchical nanoarchitectures: an *in situ* reduction synthesis and the high rate cycling performance as lithium-ion battery anodes

Yujin Chen,<sup>\*a</sup> Xinpeng Di,<sup>a</sup> Chao Ma,<sup>b</sup> Chunling Zhu,<sup>c</sup> Peng Gao,<sup>\*c</sup> Jianqi Li,<sup>b</sup> Chunwen Sun,<sup>\*b</sup> and Qiuyun Ouyang<sup>a</sup>

<sup>a</sup> Key Laboratory of In-Fiber Integrated Optics, Ministry of Education, College of Science, Harbin Engineering University, Harbin, 150001, China.

<sup>b</sup> Beijing National Laboratory for Condensed Matter Physics, Institute of Physics, Chinese Academy of Sciences, Beijing, 100190, China.

<sup>c</sup> College of Materials Science and Chemical Engineering, Harbin Engineering University, Harbin, Heilongjiang, 150001, China.

### SI-1 Experimental details

#### Materials

All reagents were analytically pure, and purchased from Tianjin Kermel Chemical Reagent Co. Ltd. (Tianjin, China), and used without further purification.

#### Synthesis of graphene sheets

The graphene sheets were synthesized by a chemical method.<sup>S1-S2</sup> Simply, 2 g of sodium was added into 5 mL ethanol. The mixture was then transferred into a Teflon-lined stainless steel autoclave with a capacity of 50 mL for hydrothermal treatment at 220 °C for 72 h. After the reaction, the graphene precursor (solid product) was obtained. This material was rapidly pyrolysed at 900 °C for about one minute, and the remaining black powder washed with distilled water. The suspended solid was

then vacuum filtered and dried in a vacuum oven at 80 °C for 24 h and then the graphene sheets were synthesized.

### **Synthesis of the hierarchical nanoarchitectures**

The hierarchical nanoarchitectures constructed by MoO<sub>2</sub> nanocrystal-functionalized graphene were synthesized by an *in situ* reduction process. MoO<sub>3</sub> particles were first obtained through ammonium paramolybdate ((NH<sub>4</sub>)<sub>6</sub>Mo<sub>7</sub>O<sub>24</sub>·4H<sub>2</sub>O) annealed at 500 °C for 4 h in air.<sup>S2</sup> The graphene sheets are mixed with MoO<sub>3</sub> powders with a mole ratios of 2:1. The mixture was ball-milled using a planetary ball mill (Fritsch Pulverisette 7) under argon atmosphere. The weight ratio of the balls to the mixture was 15:1, and the rotating speed is 600 rpm. During the process, the mixture was milled for 20 min, a time interval is 20 min, and total time is 8 h.

### **Electrode preparation and electrochemical measurements**

The samples were mixed with acetylene black and carboxymethyl cellulose (CMC) at a weight ratio of 8: 1: 1. The mixture was painted onto a copper foil with a diameter of 15 mm. The 2016 coin-type cells were assembled in an argon-filled glove box, and pure Li foils were used as the counter electrodes. The electrolyte was made of 1 M LiPF<sub>6</sub> in the mixture of ethylene carbonate (EC) and dimethyl carbonate (DMC) with the volume ratio 1:1. The cells were galvanostatically charged and discharged between 0.001 and 3.0 V versus Li<sup>+</sup>/Li at room temperature on a program-controlled test system.

### **Characterizations**

The morphology and size of the obtained hierarchical nanoarchitectures were characterized by scanning electron microscope (SEM) [HITACHI S-5200] and

transmission electron microscope (TEM) [JEOL-3010F]. The operating voltage of SEM and TEM is 5 and 200 kV, respectively. The pore diameter distribution and surface area were tested by nitrogen adsorption/desorption analysis [BECKMAN COULTER SA3100]. The crystal structure of the sample was determined by X-ray diffraction (XRD) [D/max 2550 V, Cu KR radiation]. X-ray photoelectron spectroscopy (XPS) measurements were carried out with a spectrometer with Mg Ka radiation (ESCALAB 250, Thermofisher Co.). The binding energy was calibrated with the C 1s position of contaminant carbon in the vacuum chamber of the XPS instrument (284.8 eV).

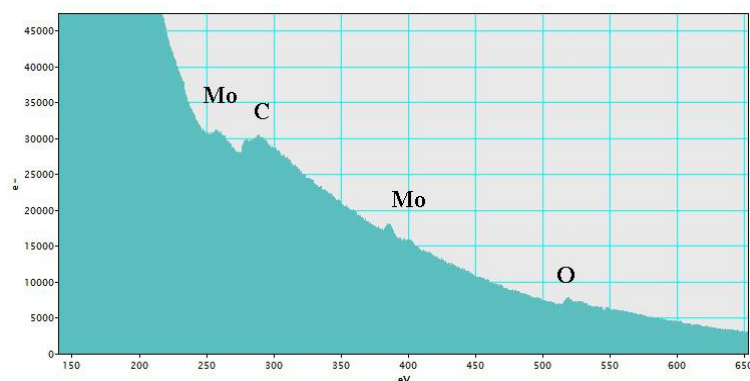

**Fig. S1** EELS spectra of the hierarchical nanoartitectures

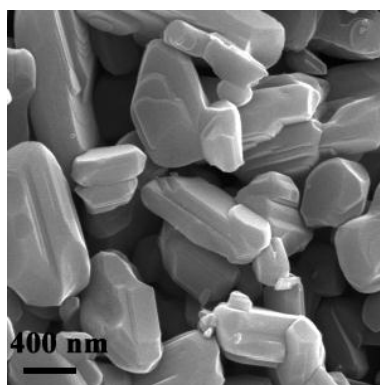

**Fig. S2** SEM image of MoO<sub>3</sub> powder

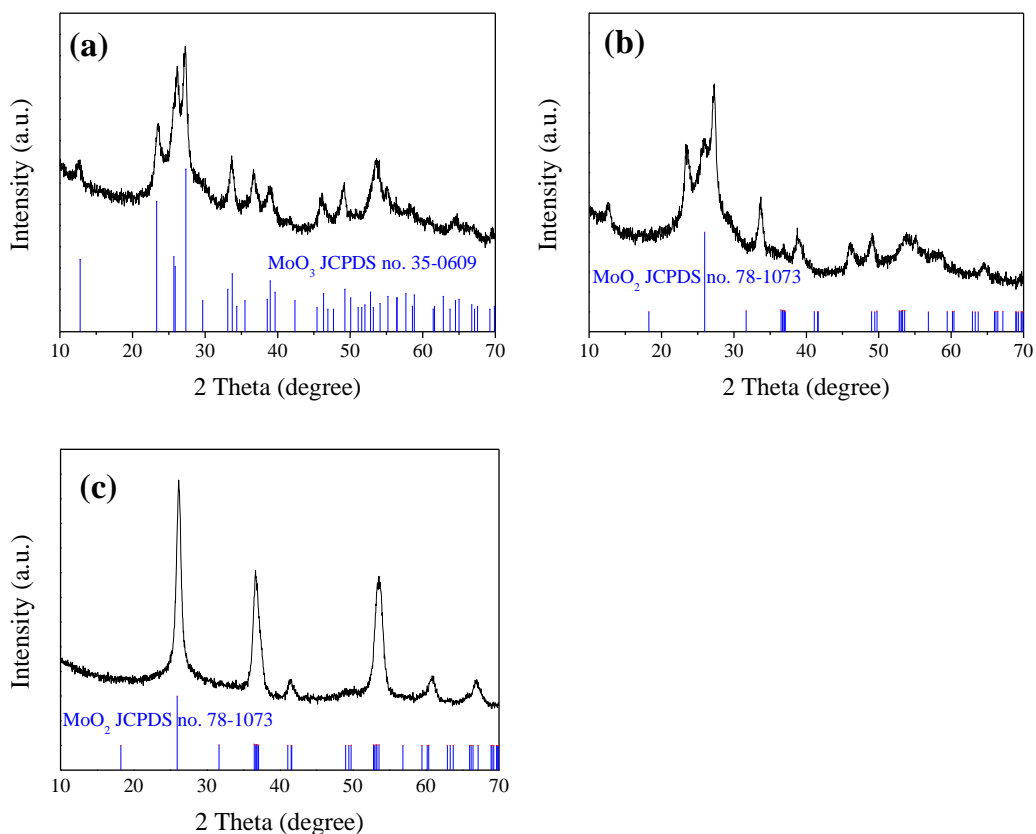

**Fig. S3** XRD patterns of the products obtained at different ball milling times: (a) 2 h, (b) 4h and (c) 6h.

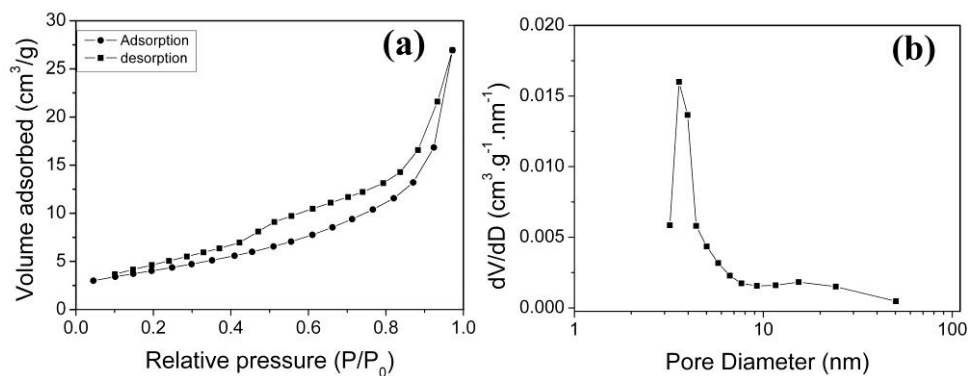

**Fig. S4** (a) The nitrogen adsorption–desorption isotherm and (b) the corresponding BJH pore size distributions of the hierarchical nanoarchitectures.

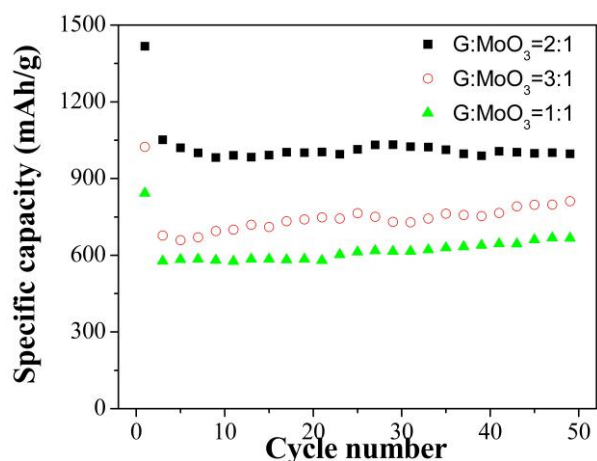

**Fig. S5** Comparison of capacities of samples with different molar ratio of graphene to MoO<sub>3</sub> powder.

## Notes and references

- S1 M. Choucair, P. Thordarson and J. A. Stride, *Nat. Nanotechnol.*, 2009, **4**, 30-33.  
S2 T. S. Wang, Z. H. Liu, M. M. Lu, B. Wen, Q. Y. Ouyang, Y. J. Chen, C. L. Zhu, P. Gao, C. Y. Li, M. S. Cao, L. H. Qi, *J. Appl. Phys.* 2013, **113**, 024314.  
S3 Y. J. Chen, F. N. Meng, C. Ma, Z. W. Yang, C. L. Zhu, Q. Y. Ouyang, P. Gao, J. Q. Li, C. W. Sun, *J. Mater. Chem.*, 2012, **22**, 12900.
